# Supplementary material for: The demise of the world's largest piedmont glacier: a probabilistic forecast
Source: Copernicus journal article supplement (doi:10.5194/tc-19-2321-2025), 2025-07-01
Supplement: Supplementary file 1 [file tc-19-2321-2025-supplement.pdf]

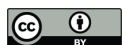

## *Supplement of*

# **The demise of the world's largest piedmont glacier: a probabilistic forecast**

**Douglas J. Brinkerhoff et al.**

*Correspondence to:* Douglas J. Brinkerhoff ([doug.brinkerhoff@mso.umt.edu](mailto:doug.brinkerhoff@mso.umt.edu))

The copyright of individual parts of the supplement might differ from the article licence.

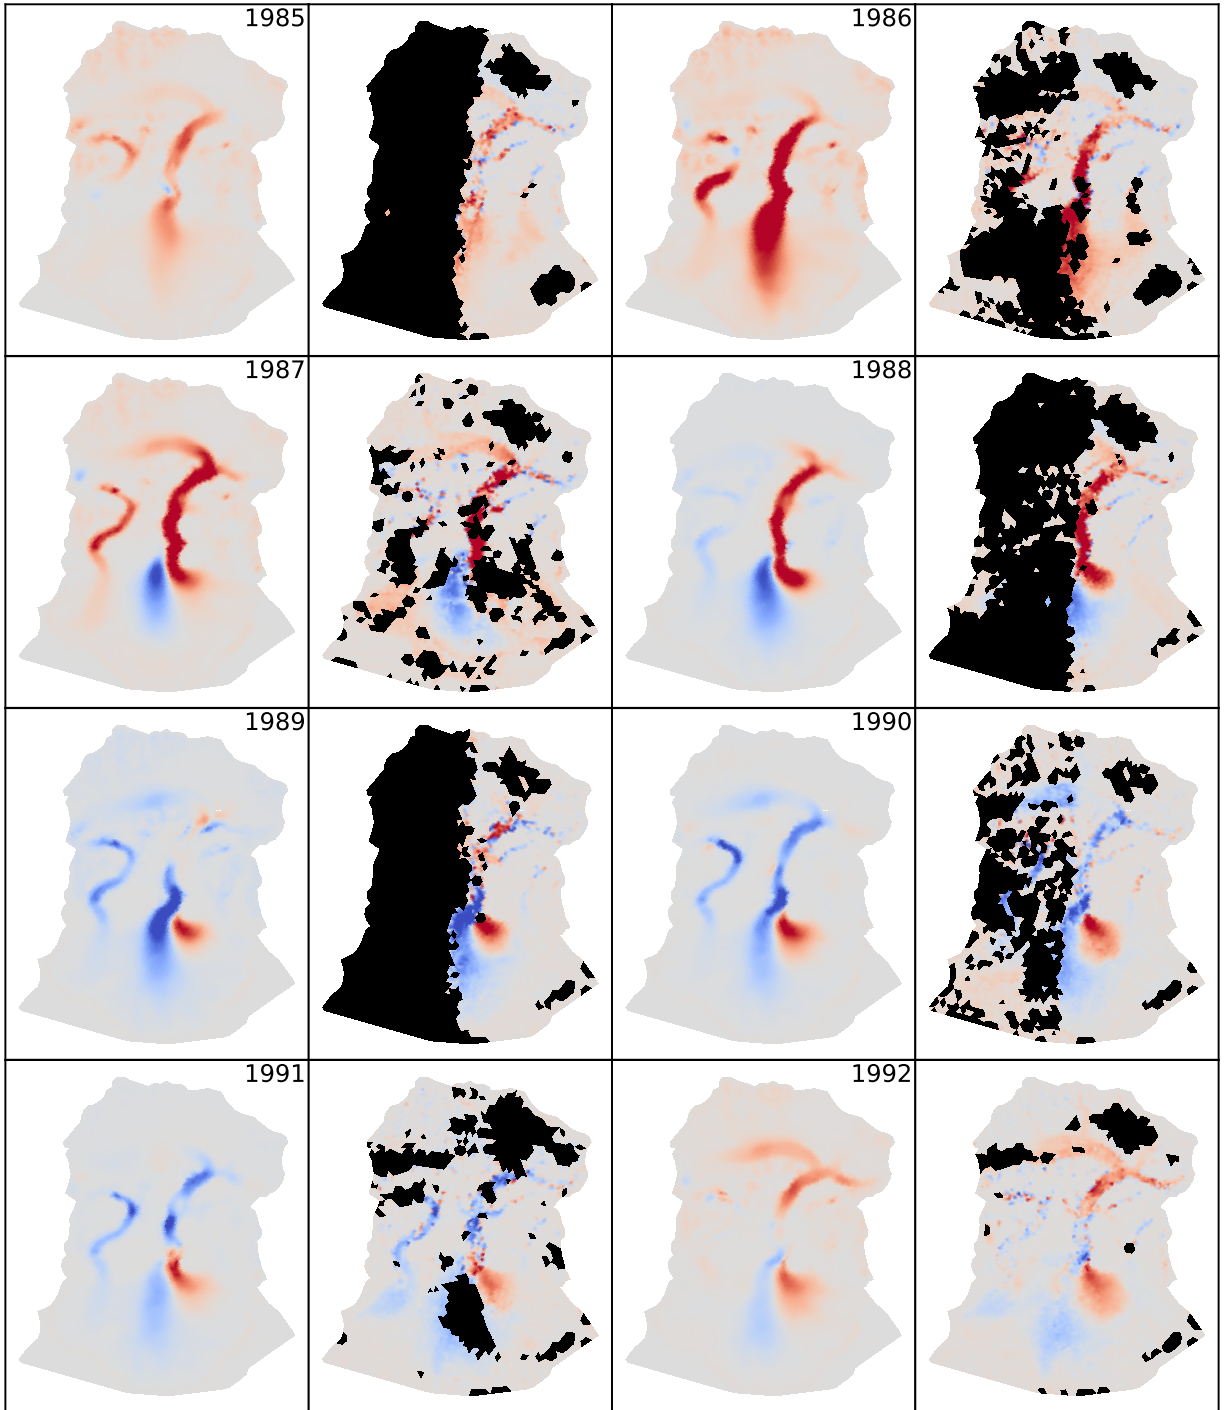

Figure S1: Modelled (left) and observed (Right) ice speed anomalies for years 1985–1992. The color scale saturates at  $-200 \text{ m a}^{-1}$  and  $200 \text{ m a}^{-1}$ .

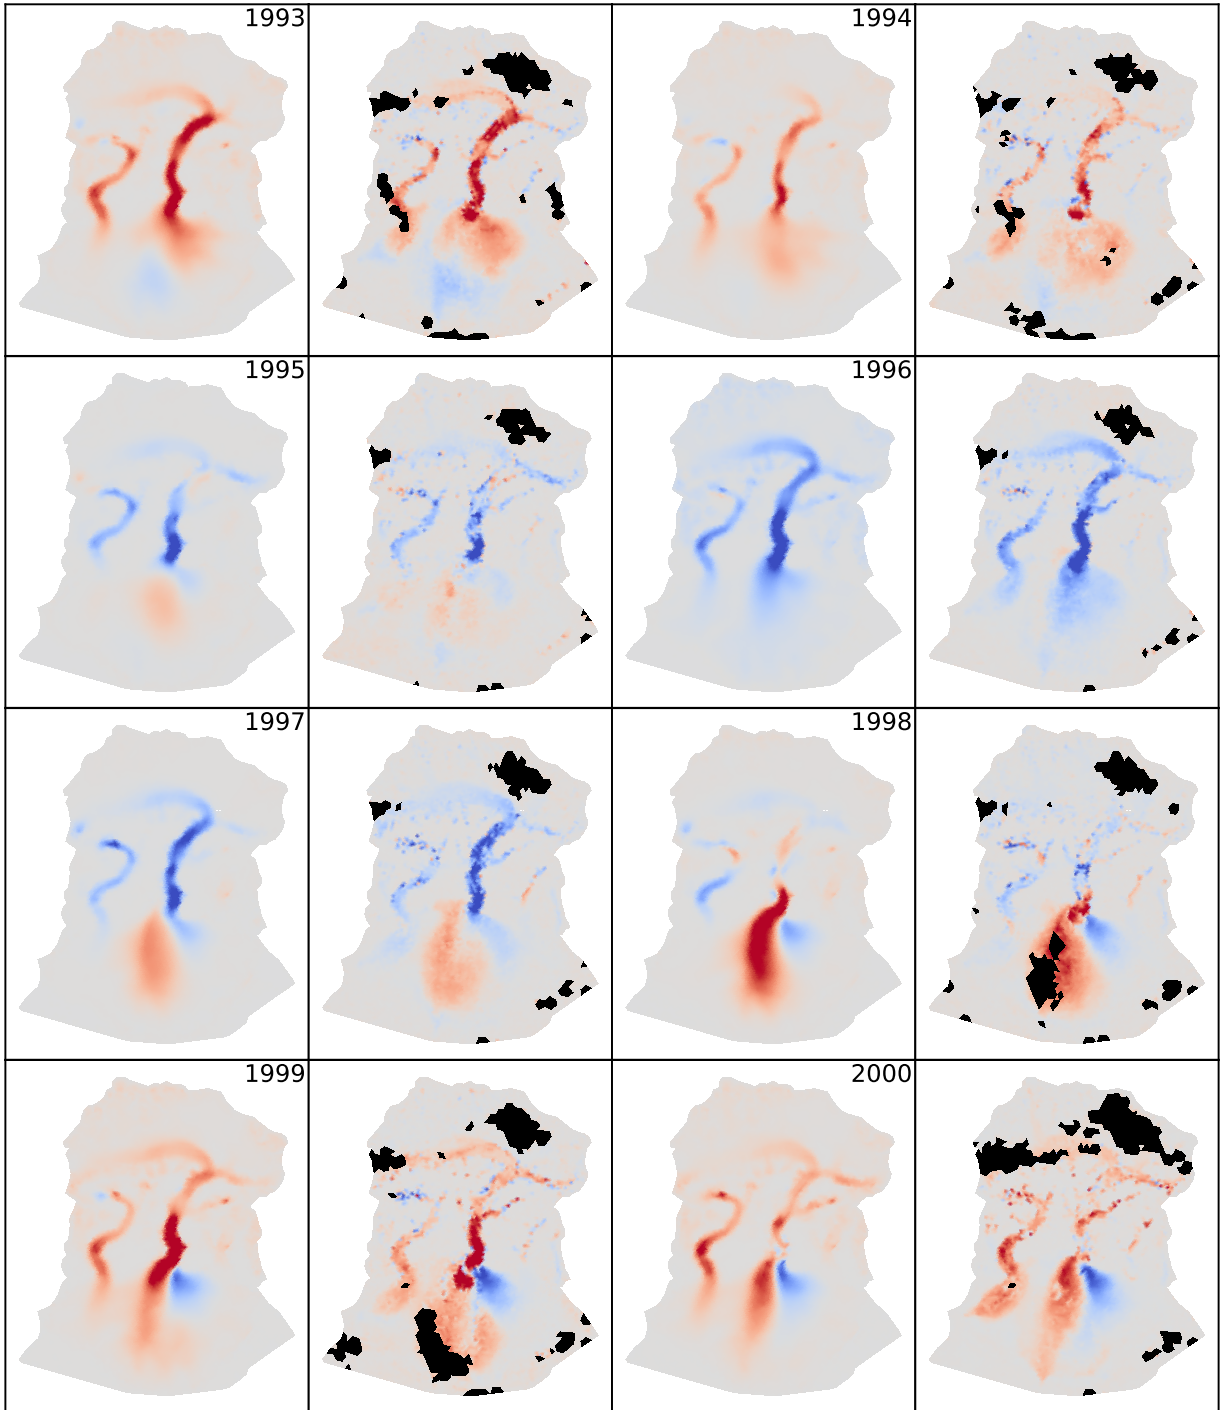

Figure S2: Modelled (left) and observed (Right) ice speed anomalies for years 1993–2000. The color scale saturates at  $-200 \text{ m a}^{-1}$  and  $200 \text{ m a}^{-1}$ .

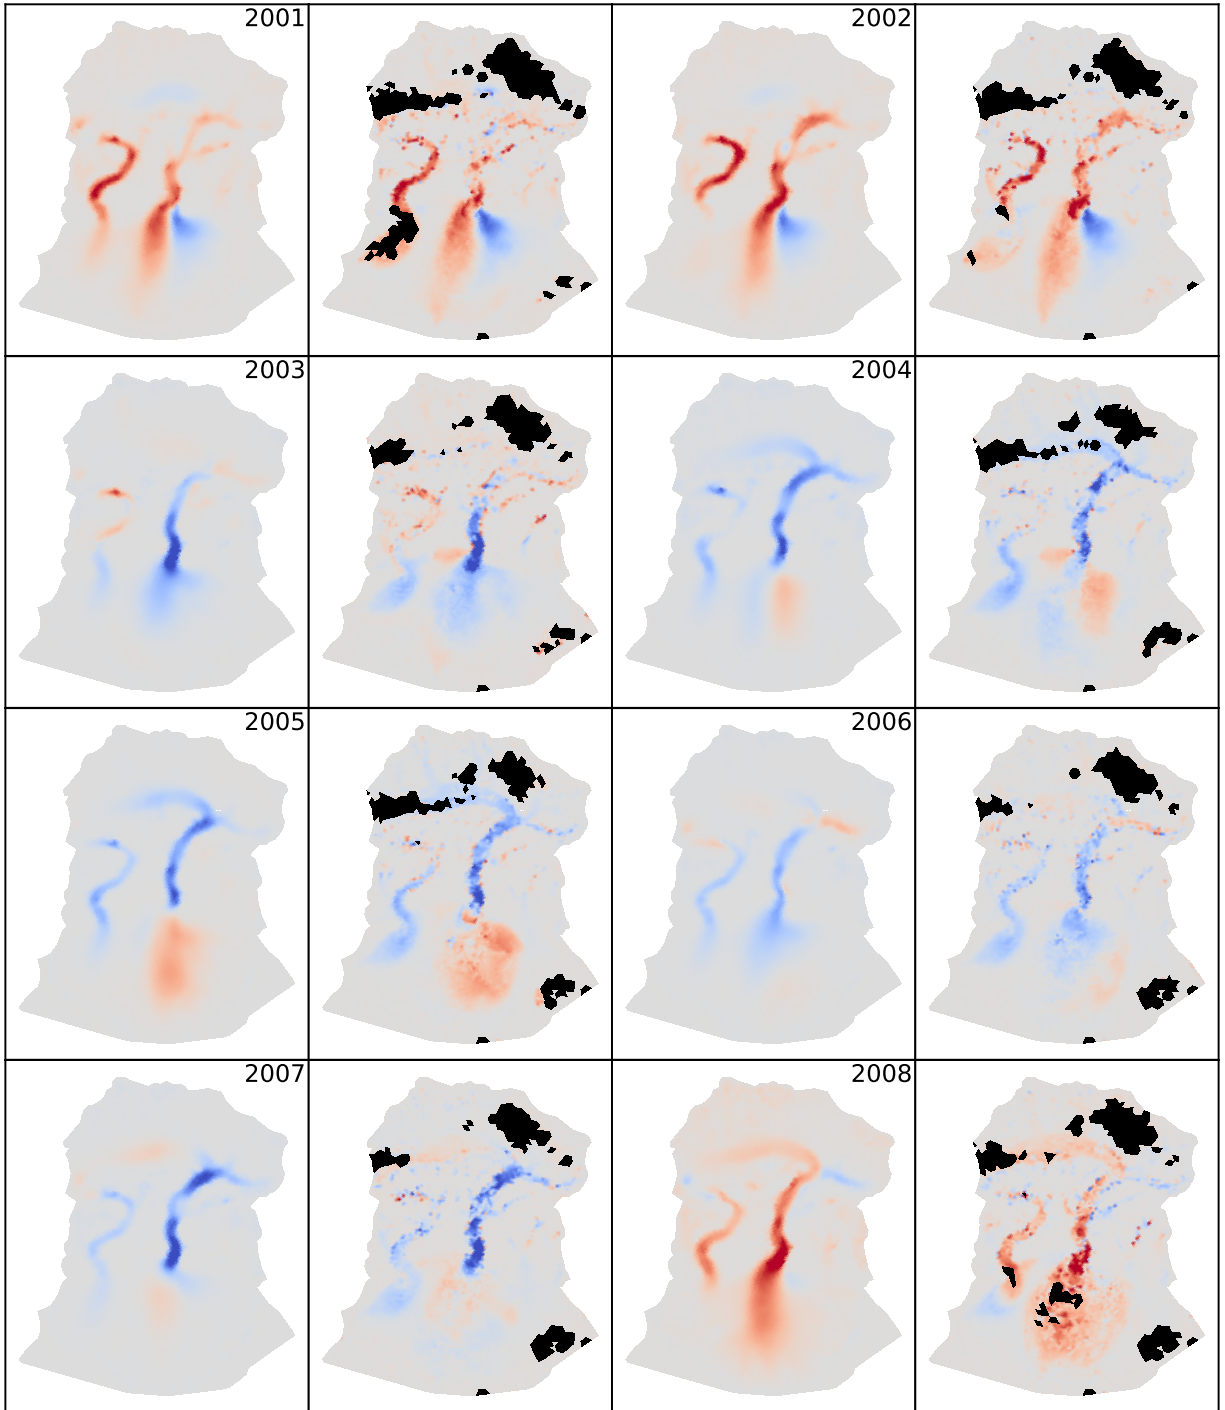

Figure S3: Modelled (left) and observed (Right) ice speed anomalies for years 2001–2008. The color scale saturates at  $-200 \text{ m a}^{-1}$  and  $200 \text{ m a}^{-1}$ .

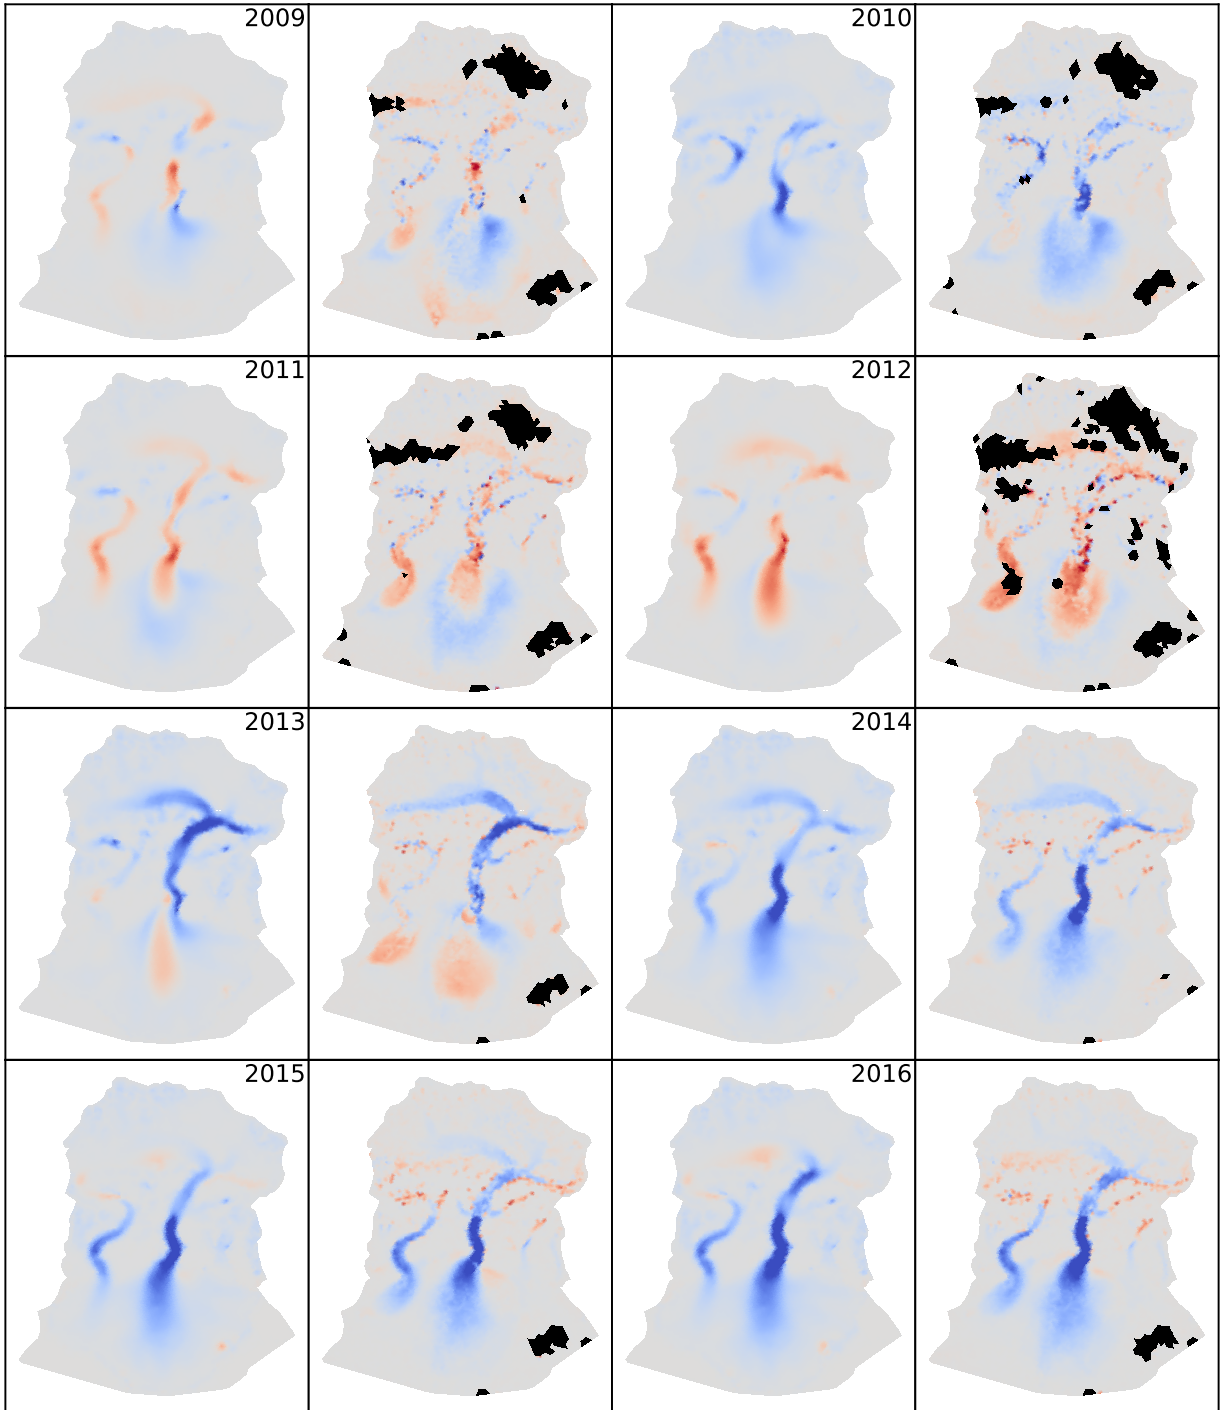

Figure S4: Modelled (left) and observed (Right) ice speed anomalies for years 2009–2016. The color scale saturates at  $-200 \text{ m a}^{-1}$  and  $200 \text{ m a}^{-1}$ .

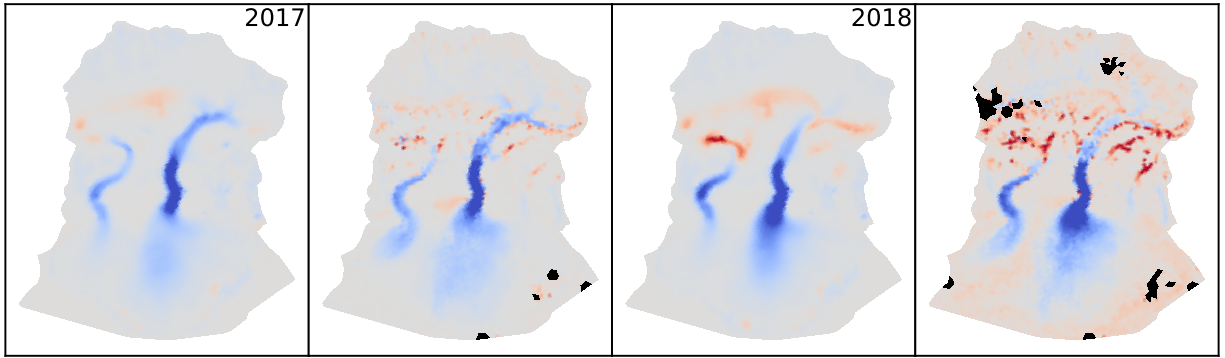

Figure S5: Modelled (left) and observed (Right) ice speed anomalies for years 2017–2018. The color scale saturates at  $-200 \text{ m a}^{-1}$  and  $200 \text{ m a}^{-1}$ .
